# Supplementary material for: The Effect of Humidity on the Dissolution Kinetics and Tablet Properties of Immediate-Release Tablet Formulation Containing Lamotrigine
Source: MDPI journal article supplement (doi:10.3390/pharmaceutics14102096), 2022-09-30
Supplement: s1 [file s1]

# Supplementary Materials: The Effect of Humidity on the Dissolution Kinetics and Tablet Properties of Immediate-Release Tablet Formulation Containing Lamotrigine

Mladena Lalić-Popović, Gordana Švonja Parezanović, Nemanja Todorović, Zoran Zeković, Branimir Pavlić, Nataša Milošević, Jelena Čanji Panić, Ana Stjepanović and Ljiljana Andrijević

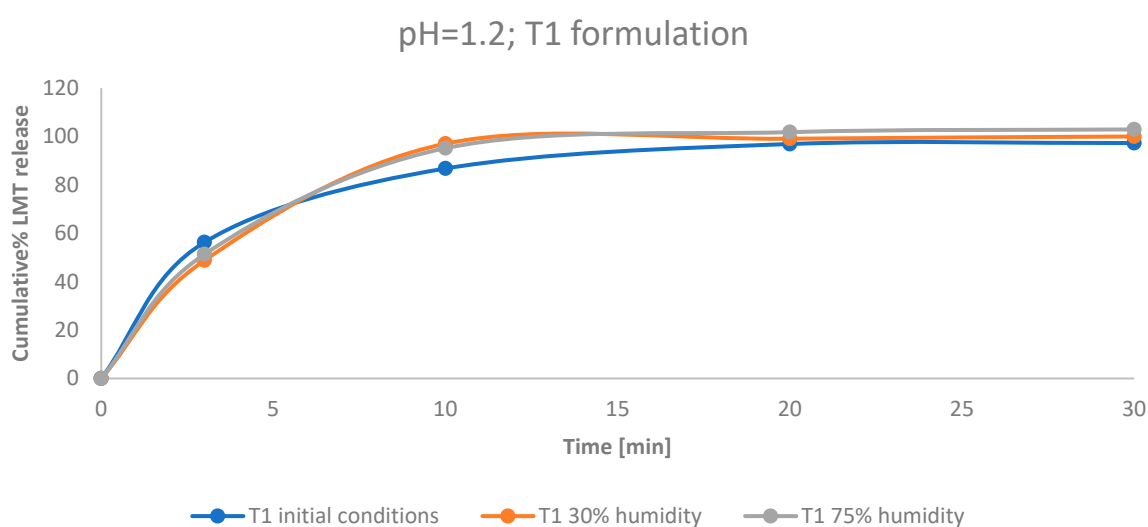

(a)

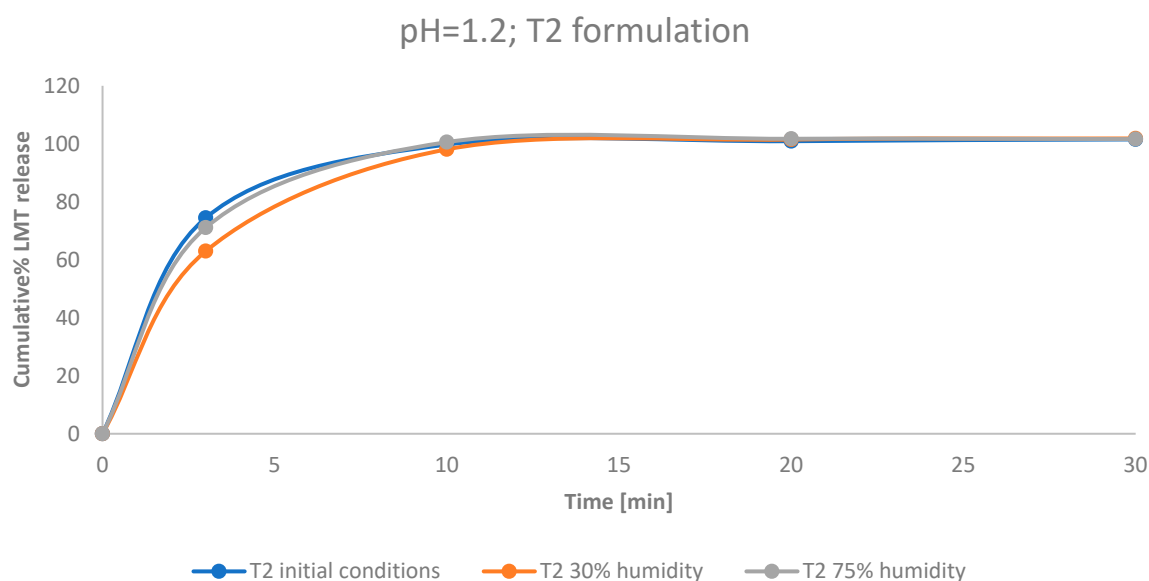

(b)

pH=1.2; T3 formulation

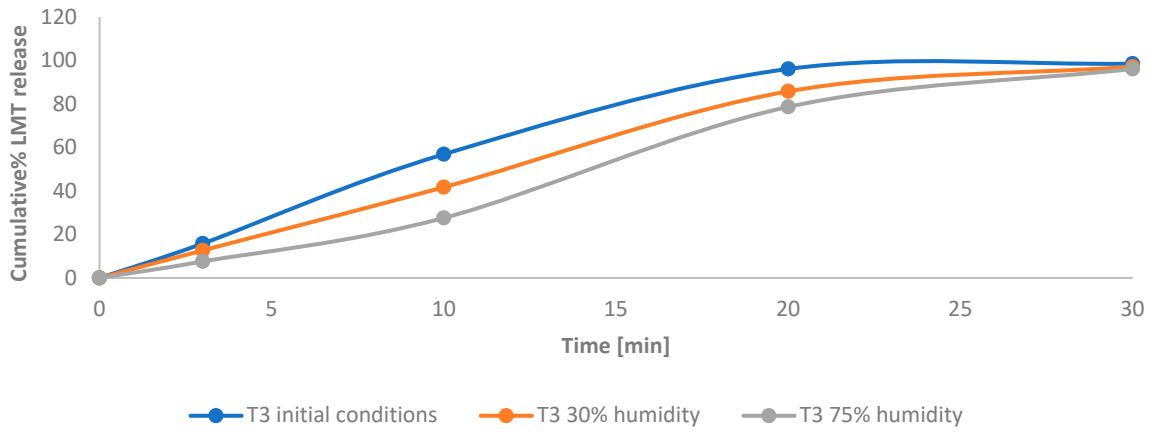

(c)

pH=1.2; T4 formulation

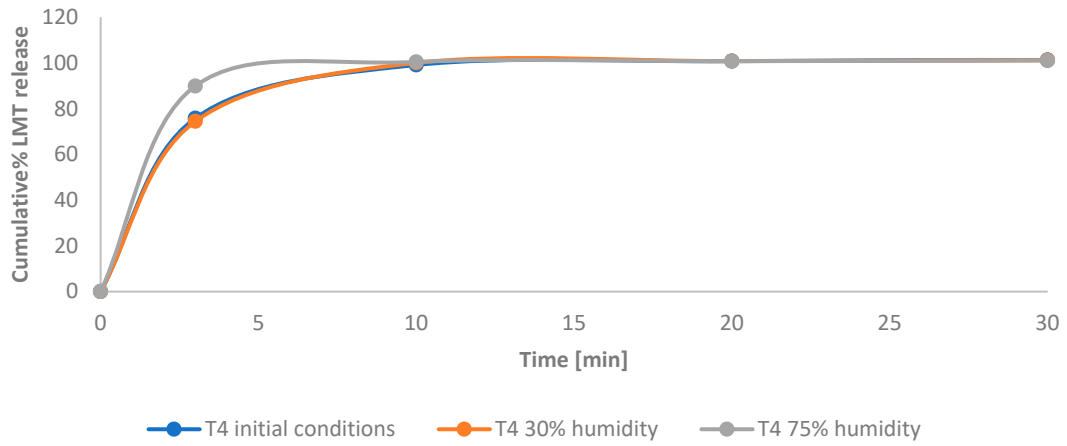

(d)

pH=1.2; T5 formulation

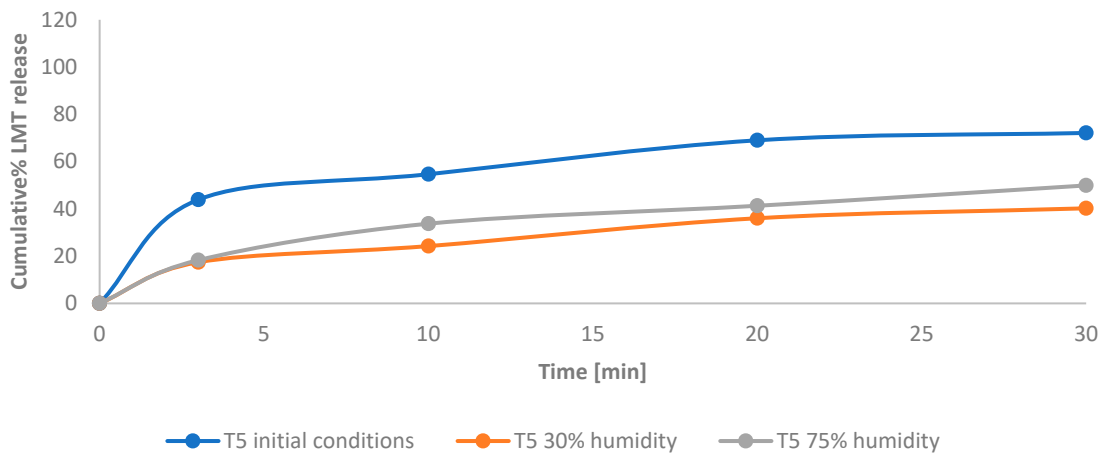

(e)

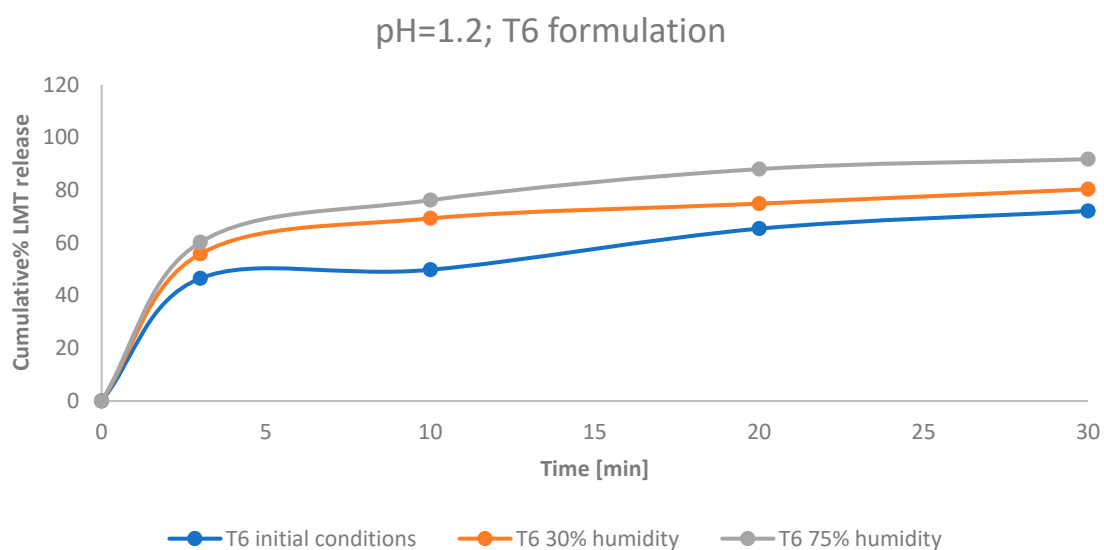

(f)

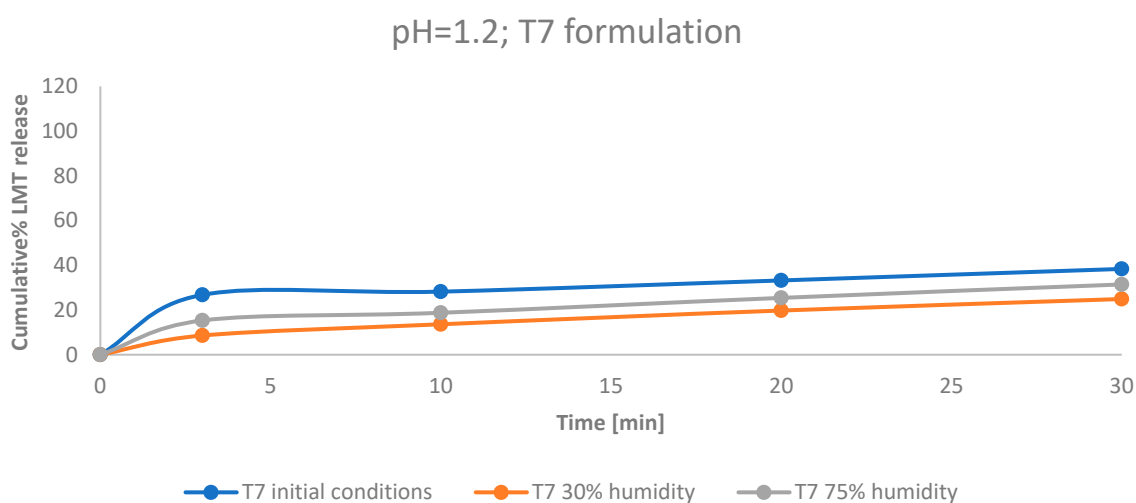

(g)

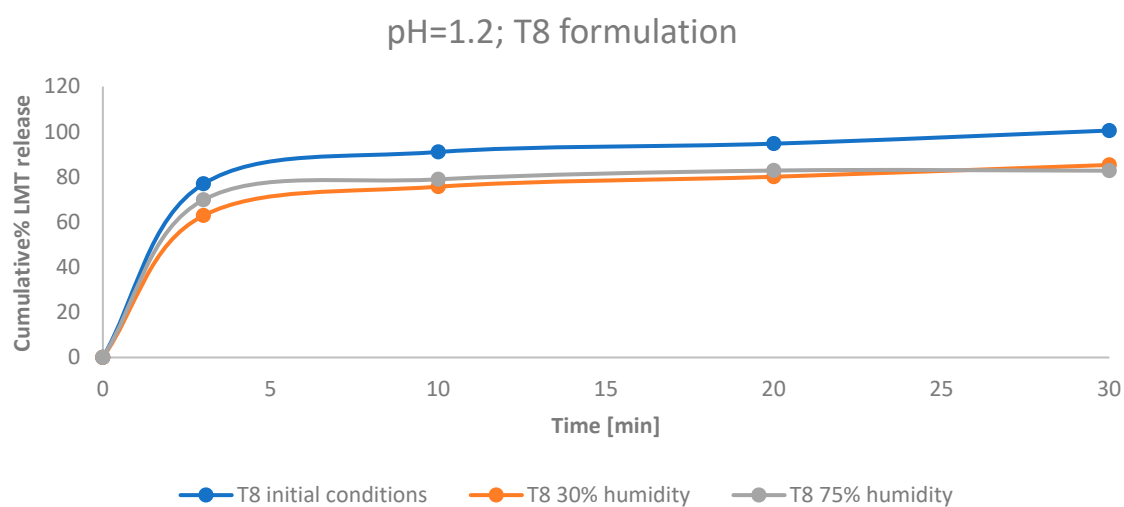

(h)

**Figure S1.** Dissolution profiles of LMT tablet formulations at dissolution medium pH 1.2 before and after exposure to conditions of reduced (30%) and increased (75%) humidity for formulation T1–T8 (a–h).

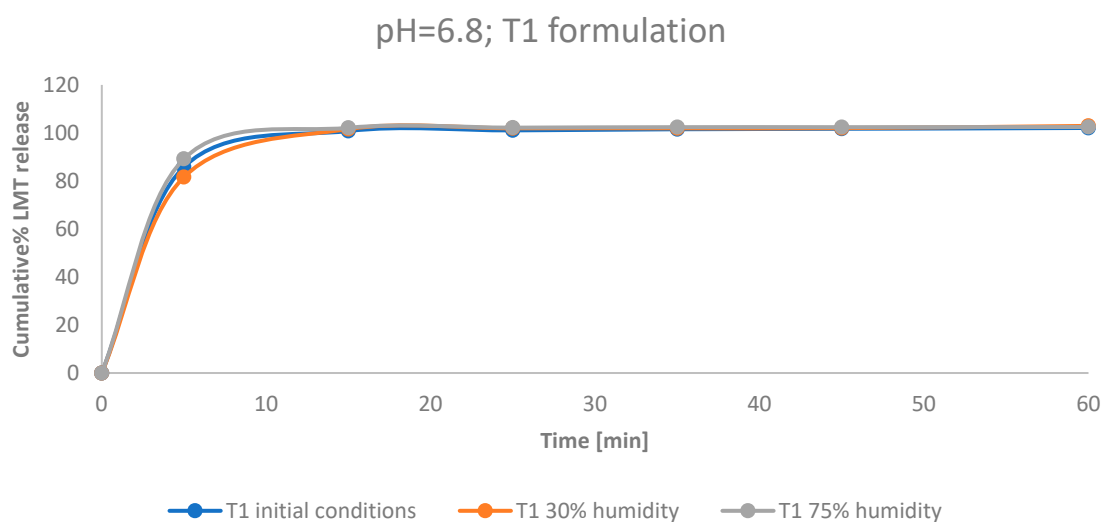

(a)

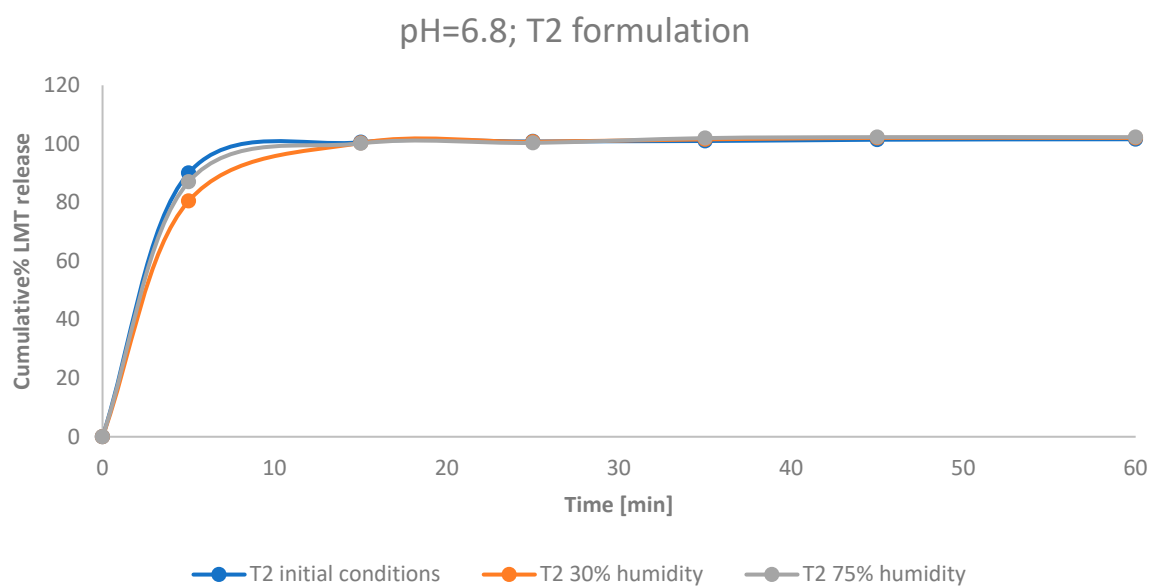

(b)

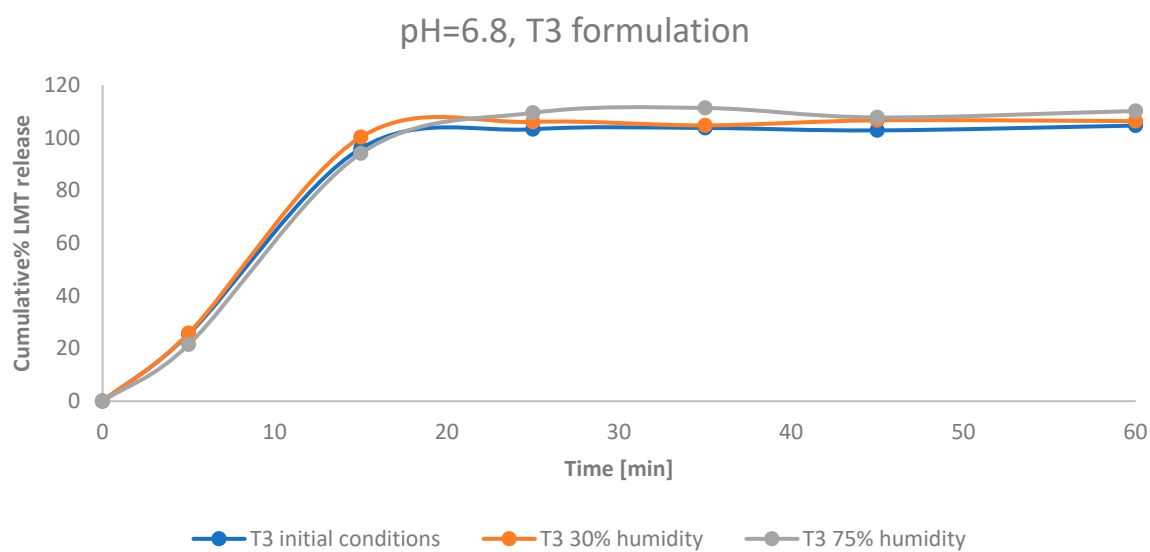

(c)

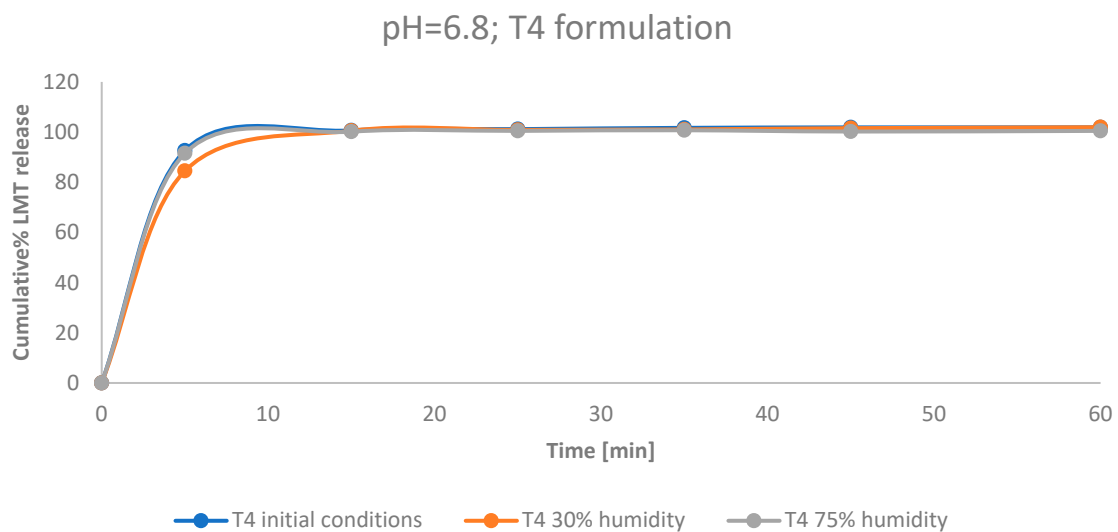

(d)

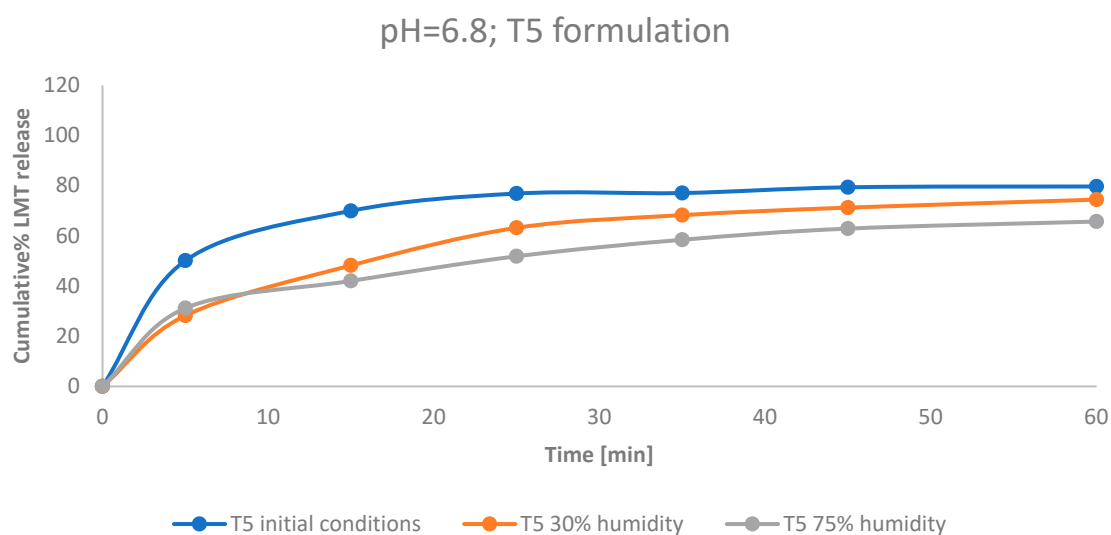

(e)

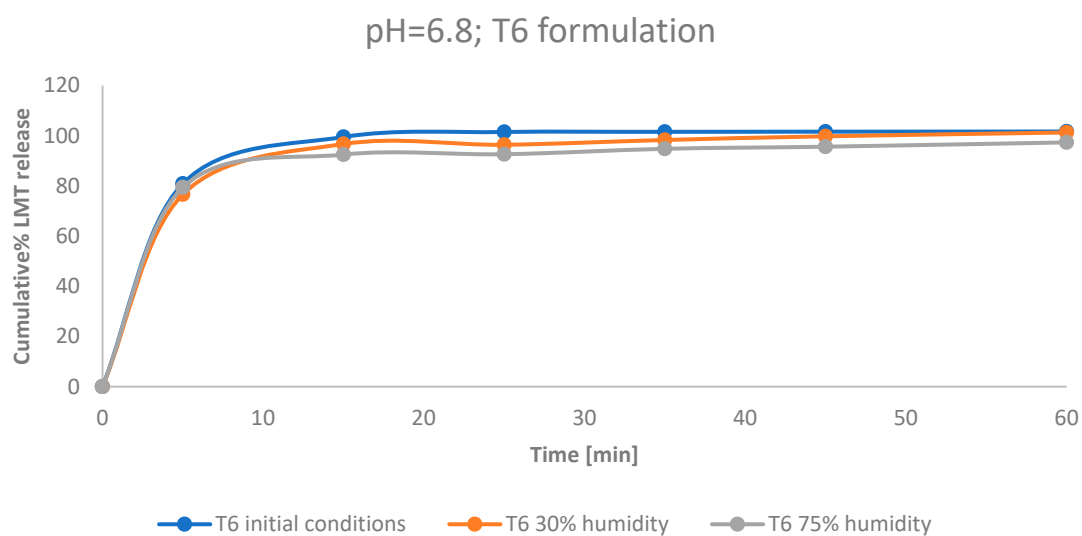

(f)

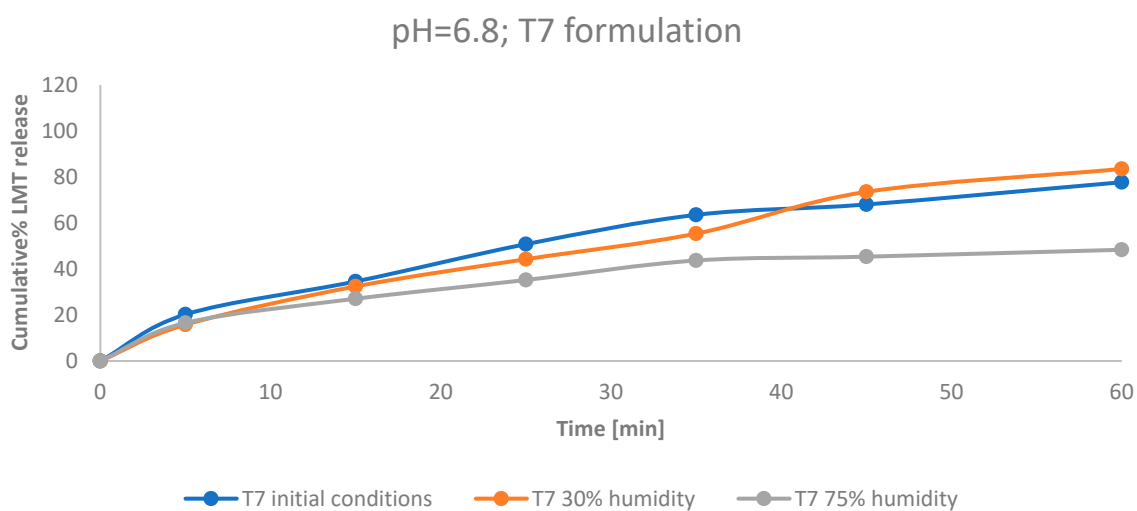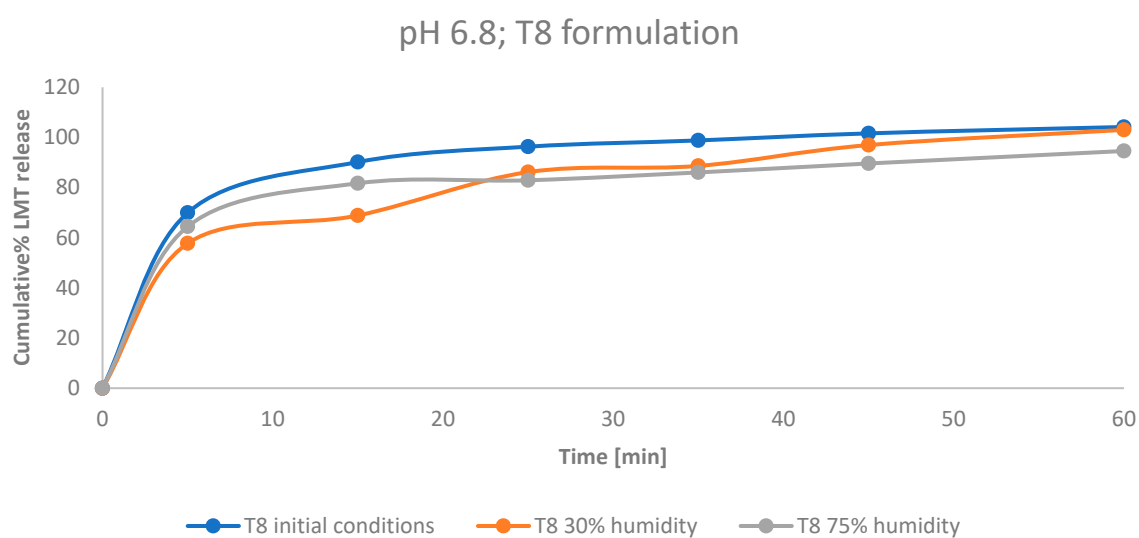

**Figure S2.** Dissolution profiles of LMT tablet formulations at dissolution medium pH 6.8 before and after exposure to conditions of reduced (30%) and increased (75%) humidity for formulation T1–T8 (a–h).
